# Supplementary material for: Distribution characteristics of nitrogen and the related microbial community in the surface sediments of the Songhua River
Source: Royal Society of Chemistry journal article supplement (doi:10.1039/d1ra04903h), 2021-01-01
Supplement: d1ra04903h1.pdf [file d1ra04903h1.pdf]

**Table S1 The sampling sites in the Songhua River**

| The name of the section               | Waterbody                           | River Basin | Sites label   |            |             | Longitude (° E) | Latitude (° N) |
|---------------------------------------|-------------------------------------|-------------|---------------|------------|-------------|-----------------|----------------|
|                                       |                                     |             | Normal season | Dry season | Common site |                 |                |
| The Menlo River Bridge                | Menlu River                         | NR          | NS1           | -          |             | 123.509         | 49.663         |
| Colo River Bridge                     | Keluo River                         | NR          | NS2           | NM2        | N2          | 125.452         | 49.406         |
| The middle reaches of the Namur River | Namoer River                        | NR          | NS3           | -          |             | 126.111         | 48.541         |
| The middle reaches of Wuyuer River    | Wuyuer River                        | NR          | NS4           | NM4        | N4          | 125.892         | 48.004         |
| Bohuotou                              | Main stream of Nenjiang River       | NR          | NS5           | NM5        | N5          | 125.184         | 49.192         |
| Laha                                  | Main stream of Nenjiang River       | NR          | NS6           | -          |             | 124.56          | 48.248         |
| Liuyuan                               | Main stream of Nenjiang River       | NR          | NS7           | -          |             | 123.919         | 47.379         |
| Jiangqiao                             | Main stream of Nenjiang River       | NR          | NS8           | NM8        | N8          | 123.701         | 46.701         |
| The middle reaches of Liu River       | Yitong River                        | SSR         | DS1           | DM1        | D1          | 126.845         | 43.113         |
| Wanjin tower                          | Yinma River                         | SSR         | DS2           | DM2        | D2          | 125.445         | 44.603         |
| Kaoshgannan tower                     | Huifa River                         | SSR         | DS3           | -          |             | 125.682         | 44.786         |
| Xilankou                              | Main stream of Second Songhua River | SSR         | DS4           | -          |             | 126.294         | 44.177         |
| Songhua River village                 | Main stream of Second Songhua River | SSR         | DS5           | -          |             | 126.189         | 44.671         |
| Songlin                               | Main stream of Second Songhua River | SSR         | DS6           | DM6        | D6          | 124.728         | 45.301         |
| The middle reaches of Laling River    | Lalin River                         | MSSR        | SS1           | SM1        | S1          | 127.064         | 44.671         |
| The middle reaches of Ashe River      | Ashi River                          | MSSR        | SS2           | SM2        | S2          | 127.013         | 45.409         |
| Tielishi                              | Hulan River                         | MSSR        | SS3           | -          |             | 128.602         | 47.034         |
| The middle reaches of Hulan River     | Hulan River                         | MSSR        | SS4           | -          |             | 127.337         | 46.892         |

|                                      |                              |      |      |      |     |         |         |
|--------------------------------------|------------------------------|------|------|------|-----|---------|---------|
| Dashan                               | Mudan River                  | MSSR | SS5  | -    |     | 128.737 | 43.756  |
| Guoshuchang                          | Mudan River                  | MSSR | SS6  | SM6  | S6  | 129.016 | 44.061  |
| Brige of Chai River                  | Mudan River                  | MSSR | SS7  | SM7  | S7  | 129.672 | 44.766  |
| Mudan River                          | Mudan River                  | MSSR | SS8  | SM8  | S8  | 129.573 | 46.003  |
| The middle reaches of Woken River    | Woken River                  | MSSR | SS9  | SM9  | S9  | 130.543 | 46.019  |
| Juyuan tree farm                     | East Tangwang River          | MSSR | SS10 | SM10 | S10 | 129.356 | 48.637  |
| Youhao                               | Tangwang River               | MSSR | S11  | -    |     | 128.859 | 47.818  |
| Tangwang River                       | Tangwang River               | MSSR | SS12 | -    |     | 127.289 | 47.648  |
| Zhaoyuan                             | Main stream of Songhua River | MSSR | SS13 | -    |     | 124.989 | 45.487  |
| Zhushun village                      | Main stream of Songhua River | MSSR | SS14 | -    |     | 126.539 | 45.759  |
| Dadingzi Mountain                    | Main stream of Songhua River | MSSR | SS15 | -    |     | 126.914 | 46.001  |
| Ferry town                           | Main stream of Songhua River | MSSR | SS16 | -    |     | 128.147 | 45.918  |
| Mudan River                          | Main stream of Songhua River | MSSR | SS17 | -    |     | 129.439 | 46.2722 |
| Kiamusze                             | Main stream of Songhua River | MSSR | SS18 | SM18 | S18 | 129.914 | 46.647  |
| Kiamusze                             | Main stream of Songhua River | MSSR | SS19 | -    |     | 130.689 | 47.032  |
| Youlin                               | Main stream of Songhua River | MSSR | SS20 | SM20 | S20 | 131.682 | 47.234  |
| Tongjiang                            | Main stream of Songhua River | MSSR | SS21 | SM21 | S21 | 132.458 | 47.661  |
| Upper Wutong River                   | Wutong River                 | MSSR | SS22 | -    |     | 130.158 | 47.95   |
| Inside the mouth of the Wutong river | Wutong River                 | MSSR | SS23 | -    |     | 130.584 | 47.288  |
| The Butong River Farm Bridge         | Wutong River                 | MSSR | SS24 | -    |     | 130.74  | 47.193  |
| Head of Indus River Farm Canal       | Wutong River                 | MSSR | SS25 | -    |     | 130.558 | 47.321  |

|                              |                              |      |      |     |    |         |        |
|------------------------------|------------------------------|------|------|-----|----|---------|--------|
| The Old Wutong river bridge  | Wutong River                 | MSSR | SS26 | -   |    | 130.166 | 47.875 |
| Under Shuangfeng Farm Bridge | Wutong River                 | MSSR | SS27 | -   |    | 130.217 | 47.736 |
| East Harbor                  | Main stream of Heilong River | HR   | HS1  | HM1 | H1 | 132.668 | 47.921 |
| Ming mountain                | Main stream of Heilong River | HR   | HS2  | HM2 | H2 | 131.079 | 47.680 |

---
